# Supplementary material for: Biases in Drosophila melanogaster protein trap screens
Source: PubMed Central journal article supplement (PMC2695487; doi:10.1186/1471-2164-10-249), 2009-05-28
Supplement: 1471-2164-10-249-S2.pdf [file 1471-2164-10-249-S2.pdf]

**A**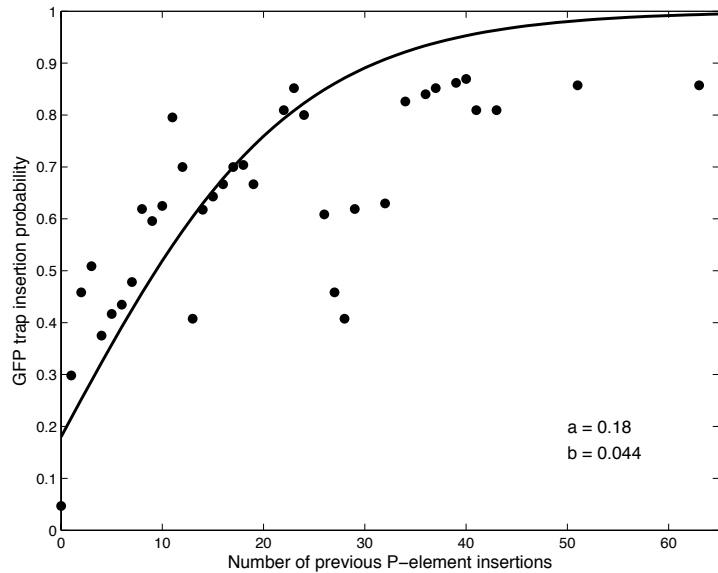**B**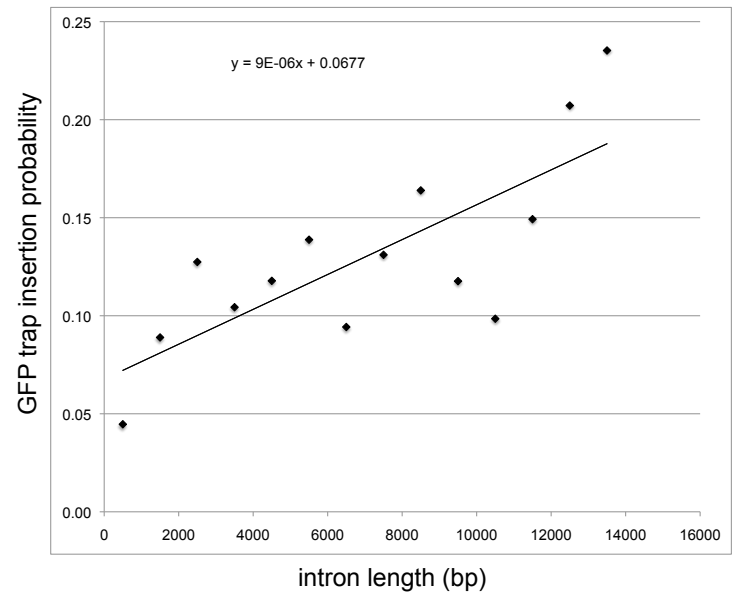**C**

|                           | disorder | no disorder |
|---------------------------|----------|-------------|
| intron with insertion     | 115      | 181         |
| introns without insertion | 377      | 1233        |
| probability               | 0.305    | 0.147       |
